# Supplementary material for: EBUS-centred versus EUS-centred mediastinal staging in lung cancer: a randomised controlled trial
Source: HighWire-hosted journal article supplement (doi:10.1136/thoraxjnl-2013-203881), 2013-10-30
Supplement: thoraxjnl-2013-203881supp_figures.pdf [file thoraxjnl-2013-203881supp_figures.pdf]

## Supplemental Figures

These figures were prepared for editors and peer reviewers, **not for posting in the Online Supplement.**

### Supplemental figure 1.

A representative case with additional gain obtained by EUS-FNA in Group A.

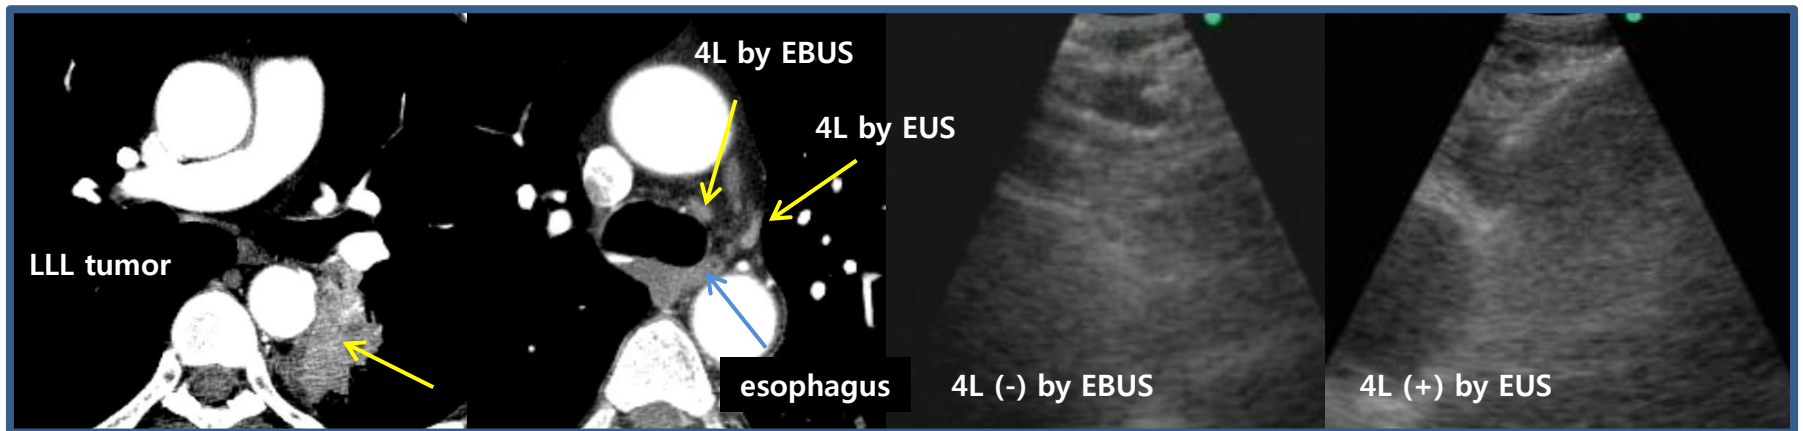

In a patient (M/65) with adenocarcinoma in the left lower lobe, EBUS-TBNA on stations 4R, 4L and 7 was negative. EUS-FNA on a deep 4L lymph node diagnosed metastasis. This lymph node was not well visualized by EBUS. N2 disease was confirmed by adding EUS to EBUS.

## Supplemental figure 2.

Representative case with additional gain of EBUS-TBNA on nodal station 7 following EUS in Group B.

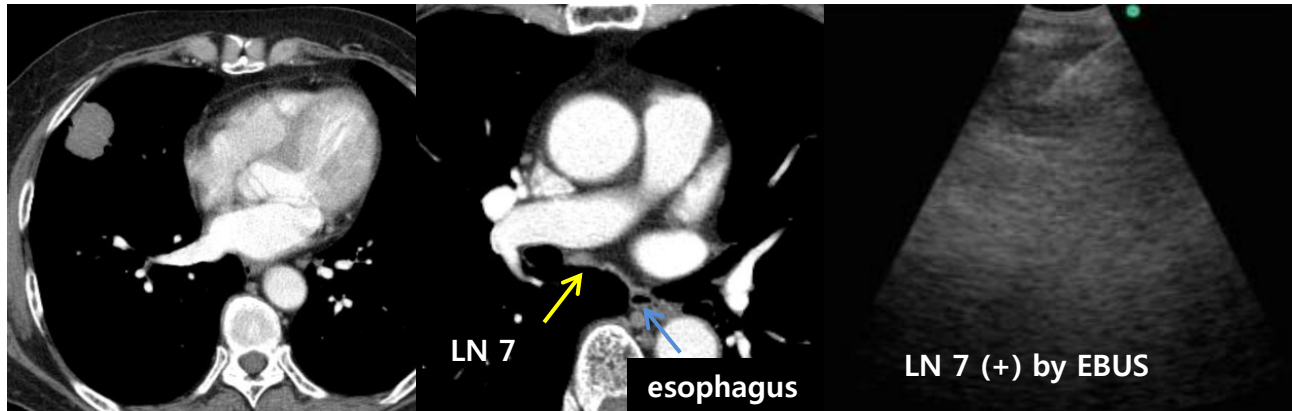

Nodal station 7 is usually accessible by EUS-FNA. However, we observed several cases with metastasis diagnosed only by EBUS at station 7. In a patient (F/68) with adenocarcinoma in the right middle lobe, EUS-FNA on station 4L was negative. A major part of station 7 was not well visualized by EUS. EBUS-TBNA on the right side of the subcarinal node detected metastasis, which diagnosed N2 disease.
